# Supplementary material
Source: PubMed Central journal article supplement (PMC5711595)

**A**

| Protein | HEK293             |       | 293T               |     | Purified standard |
|---------|--------------------|-------|--------------------|-----|-------------------|
|         | Concentration (nM) | SEM   | Concentration (nM) | SEM |                   |
| Cul1    | 522                | 21    | 345                | 12  | Protein           |
| Rbx1    | 1,724              | 61    |                    |     | Protein           |
| Cand1   | 1,210              | 6     | 851                | 5   | Protein           |
| Skp1    | 2,107              | 68    | 1,173              | 11  | Protein           |
| Skp2    | 64                 | 1     |                    |     | Protein           |
| CSN1    | 392                | 43    | 539                | 54  | Protein           |
| CSN2    | 279                | 4     | 346                | 10  | Protein           |
| CSN3    | 306                | 39    | 379                | 7   | Protein           |
| CSN4    | 447                | 27    | 380                | 16  | Protein           |
| CSN5    | 453                | 11    | 383                | 29  | Protein           |
| CSN6    | 486                | 13    | 306                | 10  | Protein           |
| CSN8    | 286                | 9     | 178                | 18  | Protein           |
| DCN1    | 325                | 29    |                    |     | Protein           |
| UBC12   | 1,225              | 2     |                    |     | Protein           |
| Nedd8   | 3,373              | 509   | 1,413              | 40  | Protein           |
| UB      | 38,767             | 3,747 |                    |     | Protein           |

**B**

| Protein      | HEK293 (Wt)        |     | HEK293 (DKO)       |     | Purified standard |
|--------------|--------------------|-----|--------------------|-----|-------------------|
|              | Concentration (nM) | SEM | Concentration (nM) | SEM |                   |
| Cand1        | 994                | 133 | N.D.               | 12  | Peptide           |
| Cand2        | 32                 | 7   | N.D.               | 94  | Peptide           |
| Skp1         | 1,765              | 94  | 1,783              | 94  | Peptide           |
| FBXO3        | 51                 | 10  | 63                 | 6   | Peptide           |
| FBXO7        | 45                 | 8   | 33                 | 3   | Peptide           |
| FBXO9        | 50                 | 1   | 23                 | 1   | Peptide           |
| FBXO11       | 22                 | 5   | 72                 | 1   | Peptide           |
| FBXO17       | 104                | 9   | 122                | 9   | Peptide           |
| FBXO22       | 83                 | 11  | 56                 | 1   | Peptide           |
| FBXO33       | 47                 | 17  | 32                 | 1   | Peptide           |
| $\beta$ TrCP | 39                 | 1   | 70                 | 4   | Peptide           |
| Skp2         | 95                 | 4   | 64                 | 5   | Peptide           |
| FBXL18       | 33                 | 2   | 23                 | 4   | Peptide           |

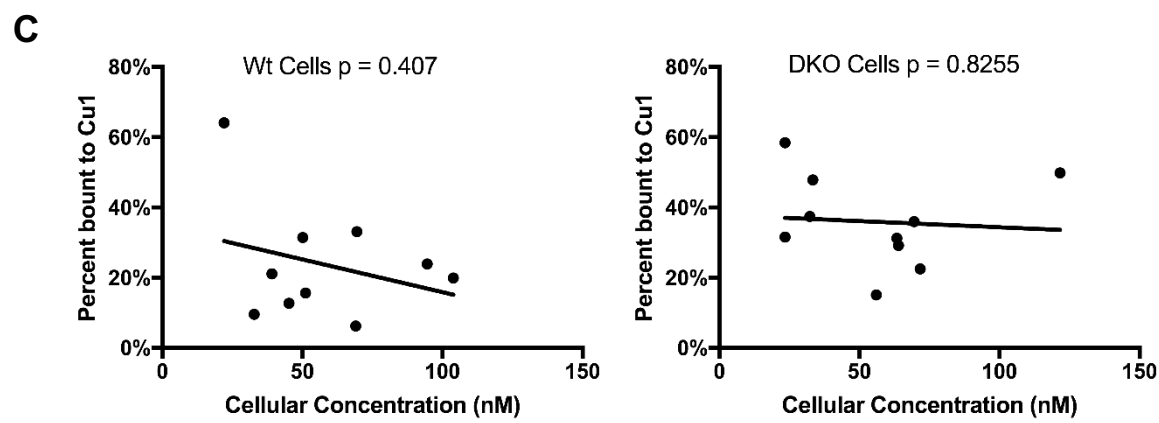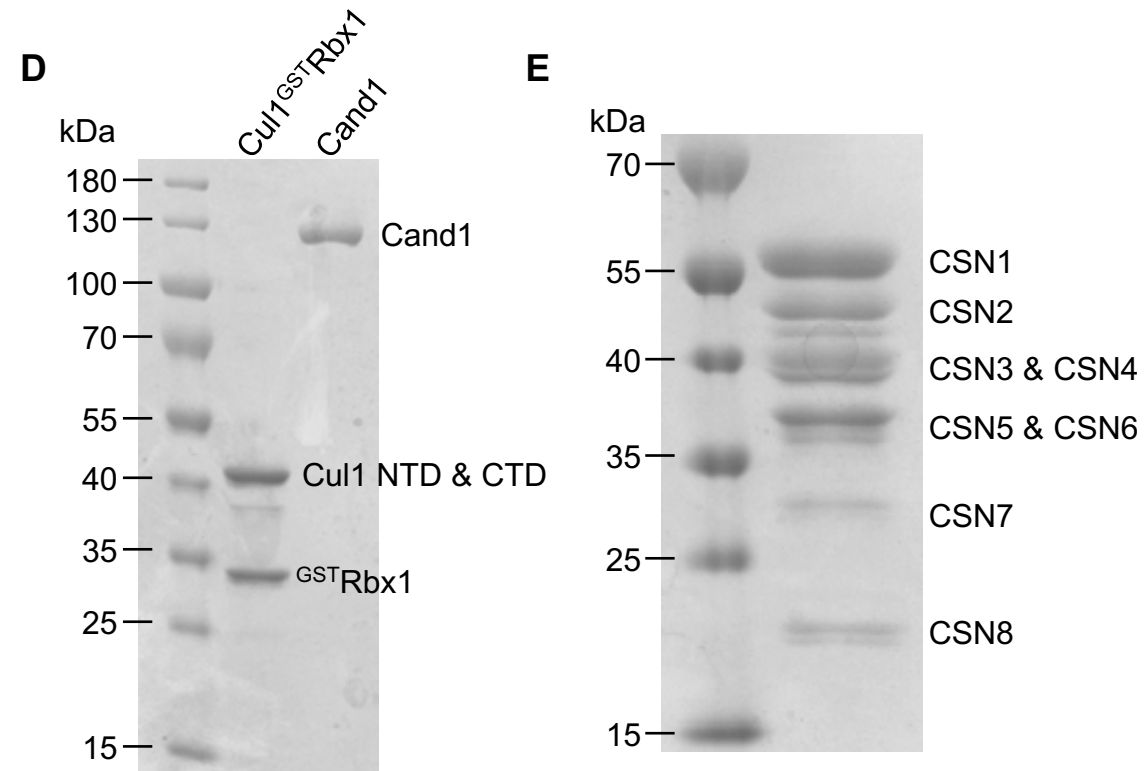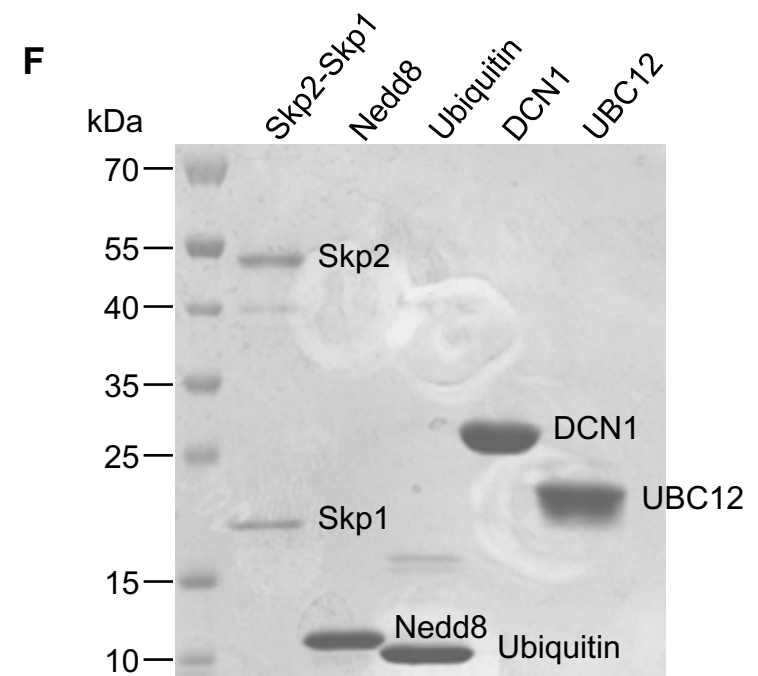

Supplement: NIHMS913228-supplement-7.pdf [file NIHMS913228-supplement-7.pdf]
